# Supplementary material for: Mussel-inspired PDA/Ag nanocomposite catalyst for highly-efficient Cr(vi) removal via visible light-induced reduction and absorption
Source: Royal Society of Chemistry journal article supplement (doi:10.1039/d3nj00622k), 2023-01-01
Supplement: d3nj00622k1.pdf [file d3nj00622k1.pdf]

## Supporting Information

### **Mussel-inspired PDA/Ag Nanocomposite Catalyst for High-efficient Cr(VI)**

### **Removal via Visible Light-induced Reduction and Absorption**

*Xi Lu<sup>a</sup>, Zhiwei Gao<sup>b</sup>, Guihua Wang<sup>c</sup>, Sheng Chen<sup>c</sup>, Yingchun Gu<sup>c</sup>, Bin Yan<sup>c</sup>, Qin Yang<sup>c\*</sup>*

*<sup>a</sup> Sinopec Petroleum Exploration and Production Research Institute, Beijing, 100083, China*

*<sup>b</sup> Xinjiang Xinchun Petroleum Development Co., Ltd., Sinopec, Dongying, Shandong, 257000,*

*China*

*<sup>c</sup> National Engineering Laboratory for Clean Technology of Leather Manufacture, College of*

*Biomass Science and Engineering, Sichuan University, Chengdu, 610065, China*

*\*Corresponding authors. E-mail: yangqin@scu.edu.cn (Q. Y)*

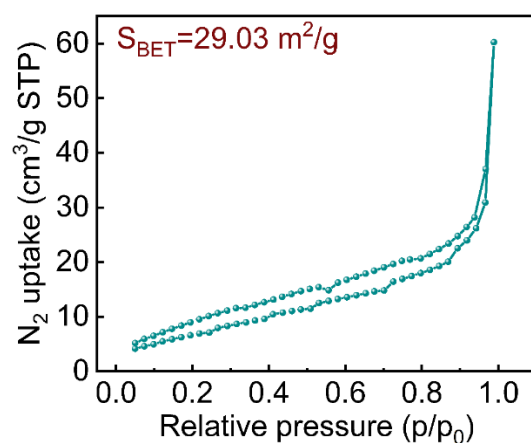

**Fig. S1.** Nitrogen adsorption-desorption isothermal curve of PDA/AgNPs at 77 K.

**Table S1.** EDS analysis of PDA/AgNPs-2.

| Element | Atomic Fraction (%) | Mass Fraction (%) |
|---------|---------------------|-------------------|
| C       | 59.61               | 40.62             |
| N       | 10.02               | 7.96              |
| O       | 22.83               | 20.72             |
| P       | 3.54                | 6.22              |
| Ag      | 4.00                | 24.48             |

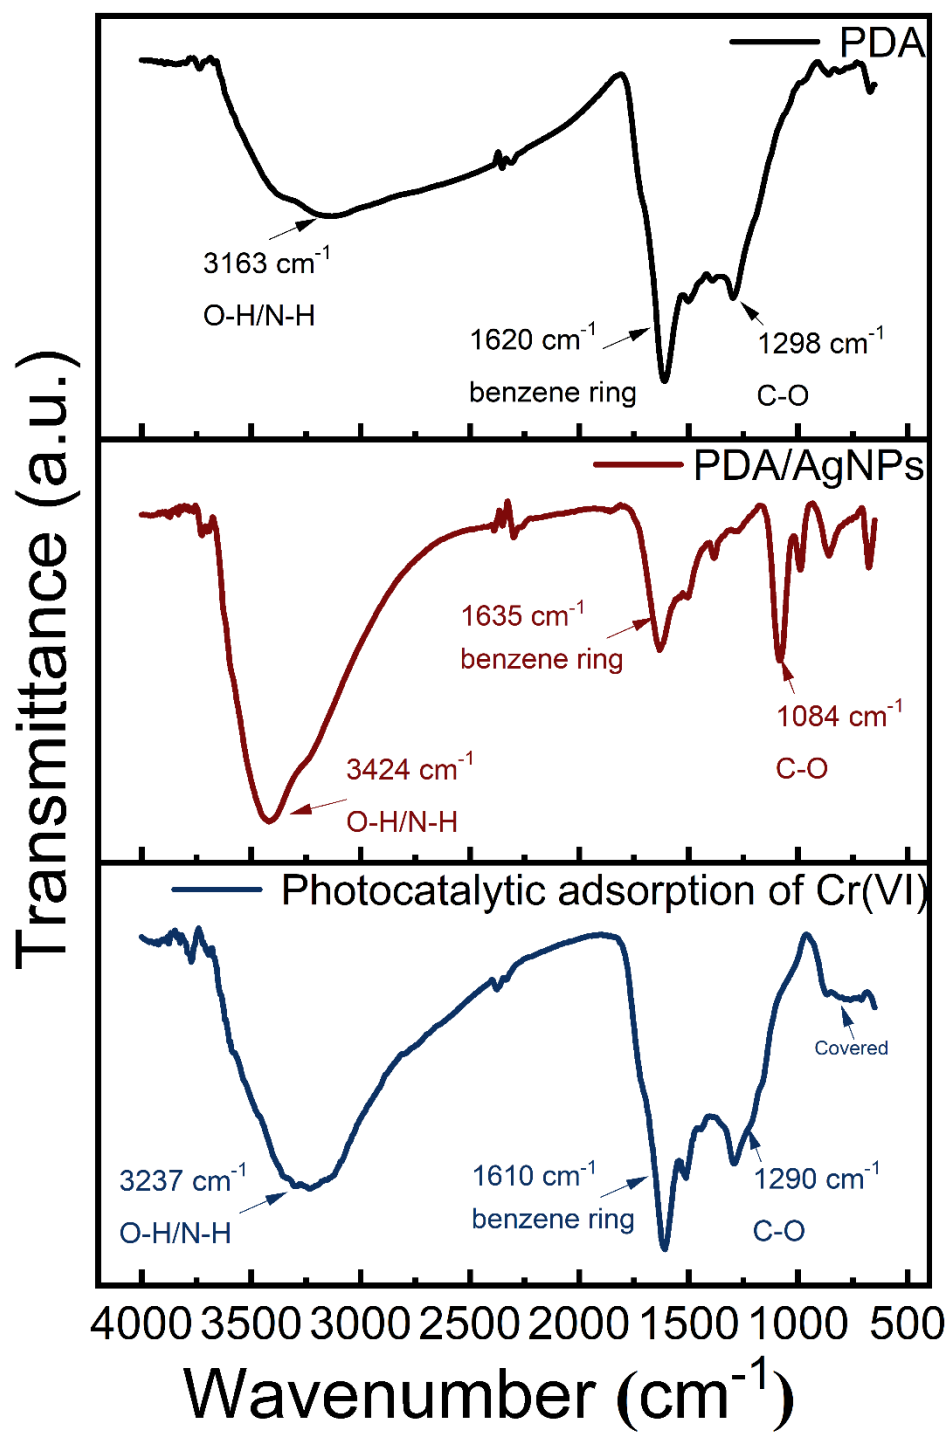

**Fig. S2.** FT-IR spectra of PDA (black), PDA/AgNPs (red), and PDA/AgNPs (blue) after photocatalytic adsorption of Cr(VI).

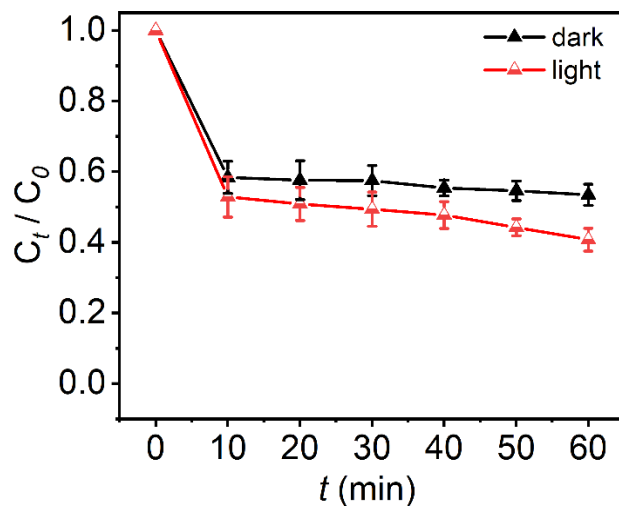

**Fig. S3.** Removal ratios of Cr(VI) with PDA upon illumination or in dark. Reaction conditions: 0.1 g/L PDA, 10 mg/L Cr(VI) and 5.6 mmol/L CA in 25 mL solution, pH = 2.80, T = 298 K.

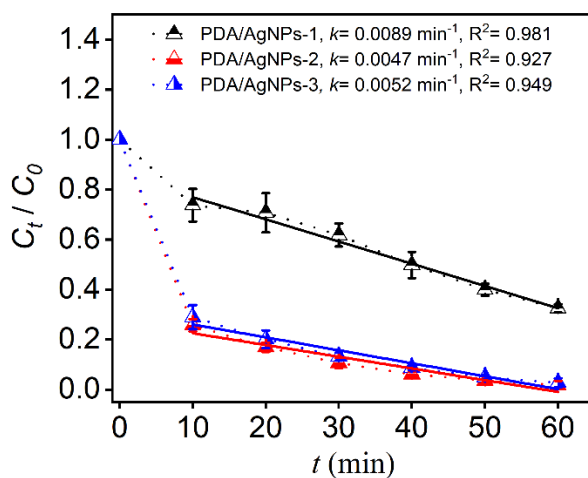

**Fig. S4.** Plots of  $C_t/C_0$  vs irradiation time for the removal of Cr(VI) by different PDA/AgNPs between 10 min and 60 min.

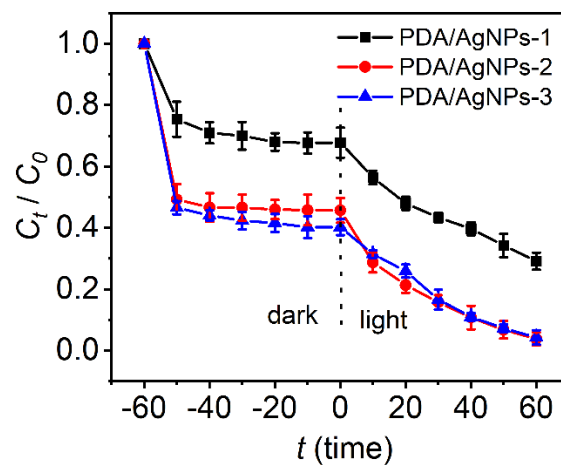

**Fig. S5.** Absorption and photoreduction of Cr(VI) over different PDA/AgNPs composites upon visible-light irradiation ( $\lambda > 420$  nm). Conditions: 0.1 g/L photocatalyst, 10 mg/L Cr(VI) and 5.6 mmol/L CA in 25 mL solution, pH = 2.80, T = 298 K.
